# Supplementary material for: Alternative metabolic pathways and strategies to high-titre terpenoid production in Escherichia coli
Source: Nat Prod Rep. 2021 Jul 7;39(1):90–118. doi: 10.1039/d1np00025j (PMC8791446; doi:10.1039/d1np00025j)
Supplement: NP-039-D1NP00025J-s001 [file NP-039-D1NP00025J-s001.xlsx]

## Sheet: Sheet1
Terpenoid and derivatives	Highest reported titre (mg/L culture)*	Engineered precursor pathway	MVA/MEP/alternative enzymes	Prenyltransferase, terpenoid synthase and modifying enzymes	Other	Time (h)	T (°C)	Fermentation setup	Hydrophobic overlay/solid adsorbant/chromatography/off-gas measurement	Scale (L)	Starting OD	Growth medium	Carbon source	Strain	Reference
Hemiterpenoids
Isoprene	60	MVA	EfAACT/HMGR, EfHMGS, ScM5K, ScPMK, ScDMD, Methanosarcina mazei M5K, and ScIDI	Populus alba IspS	EcPgl	60	37?	Fed batch	Off-gas measurement	14	?	?	Glucose	BL21 (DE3)	76
Isoprenol	10.8	IPP bypass	EcAACT, SaHMGS, SaHMGR, Methanosarcina mazei M5K, and ScDMD variant	(native phosphatases)	∆poxA ∆ackA ∆pta	95	30	Fed batch	20% oleyl alcohol	2	0.4-0.6	Modified M9	3% glucose	DH1	127
Monoterpenoids
Limonene	3.65*	MVA	EcAACT, SaHMGS, SaHMGR, ScM5K, ScPMK, ScDMD, and EcIDI	AgGPPS, Mentha spicata LS		24	30	Fed batch	50% DINP	1	7 g/L CDW	M9	1.5% glycerol	BL21 (DE3)	160
Perillyl alcohol	0.105	MVA	EcAACT, SaHMGS, SaHMGR, ScM5K, ScPMK, ScDMD, and EcIDI	AgGPPS, Mentha spicata LS, Mycobacterium HXN-1500 CYP153A6		48	30	Shake flask?	None	?	1	EZ-rich	1% glucose	DH1	138
Sabinene	2.65	MVA	EfAACT/HMGR, EfHMGS, ScM5K, ScPMK, ScDMD, and ScIDI	AgGPPS, Salvia pomifera SabS		24	30	Fed batch	None	2	11	Beef powder	2% glycerol	BL21 (DE3)	161
Geraniol	2.124	MVA	EcAACT, SaHMGS, SaHMGR, ScM5K, ScPMK, ScDMD, and EcIDI	AgGPPS, Ocimum basilicum GES		48	25	Microtitre plate	10% isopropyl myristate	0.0002	0.8-1	TB	2% glycerol	DH5α	170
Geranyl acetate	4.8	MVA	EcAACT, SaHMGS, SaHMGR, ScM5K, ScPMK, ScDMD, and EcIDI	AgGPPS, Ocimum basilicum GES, Rosa hybrida AAT		95	30	Fed batch	10% dodecane	1.2	20	Modified TB	0.5-1% glucose	C43 (DE3)	163
Linalool	1.523	MVA	EcAACT, SaHMGS, SaHMGR, ScM5K, ScPMK, ScDMD, and EcIDI	AgGPPS, Streptomyces clavuligerus LinS		117	30	Fed batch	10% isopropyl myristate	0.6	10-30	AM	1.5% glycerol	DH1	307
a-Pinene	0.97	MVA	EfAACT/HMGR, EfHMGS, ScM5K, ScPMK, ScDMD, and ScIDI	AgGPPS, Pinus taeda Pt30		32	30	Fed batch	Off-gas measurement	2	6	Beef extract	0.5% glucose	BL21 (DE3)	164
1,8-Cineole	0.653	MVA	EcAACT, SaHMGS, SaHMGR, ScM5K, ScPMK, ScDMD, and ScIDI	EcIspA variant, AgGPPS, Streptomyces clavuligerus CS		48	30	Shake flask?	10% dodecane	?	0.8	EZ-rich	1% glucose	DH1	165
Hydroxycineole	0.056	MVA	EcAACT, SaHMGS, SaHMGR, ScM5K, ScPMK, ScDMD, and ScIDI	AgGPPS, Streptomyces clavuligerus CS, Citrobacter braakii CYP176A1		48	30	Shake flask?	None	0.005	?	EZ-rich	1% glucose	DH1	308
Myrcene	0.058	MVA	EcAACT, ScHMGS, ScHMGR, ScM5K, ScPMK, ScDMD, and EcIDI	AgGPPS, Quercus ilex MS		72	30	Shake flask	20% dodecane	0.05	0.8-1	EZ-rich	1% glycerol	DH1	166
C11
2-Methylenebornane	0.014	MVA	EcAACT, SaHMGS, SaHMGR, ScM5K, ScPMK, ScDMD, and EcIDI	AgGPPS, Streptomyces coelicolor GPP-methyltransferase, Pseudomonas fluorescens 1-methylenebornane synthase		24	30	Shake flask	None	0.015	0.1	2YT	2% glycerol	MG1655	146
Sesquiterpenoids
Amorphadiene	30	MVA	EcAACT, ScHMGS, ScHMGR, ScM5K, ScPMK, ScDMD, and ScIDI	EcIspA, Artemisia annua ADS		56	30	Fed batch	20% dodecane	0.1	30-40	Defined media	glucose	MG1655	172
Artemisinic-11S,12-epoxide	0.25	MVA	EcAACT, ScHMGS, ScHMGR, ScM5K, ScPMK, ScDMD, and ScIDI	EcIspA, Artemisia annua ADS, Bacillus megaterium CYP102A1		48	30	Shake flask/tube?	None	0.005?	0.25	TB	2% glycerol	DH1	173
Artemisinic acid	0.105	MVA	EcAACT, ScHMGS, ScHMGR, ScM5K, ScPMK, ScDMD, and ScIDI	EcIspA, Artemisia annua ADS, CYP71AV1 and CPR		168	20	Shake flask	None	0.05	0.6	TB	2% glycerol	DH1	174
Viridiflorol	25.7	MVA	EcAACT, ScHMGS, ScHMGR, ScM5K, ScPMK, ScDMD, and ScIDI	EcIspA, Melaleuca quinquenervia VS		41	30	Fed batch	20% dodecane	0.1	30-40	Defined media	glucose	MG1655	172
b-Farnesene	10 .67	MVA	EcAACT, ScHMGS, ScHMGR, ScM5K, ScPMK, ScDMD, and EcIDI	EcIspA, Artemisia annua FS		48	33	Fed batch	10% decane	5	1	YT	1% glycerol	BL21 (DE3)	175
(-)-a-Bisabolol	9.1	MVA	EfAACT/HMGR, EfHMGS, SpM5K, SpPMK, SpDMD, and EcIDI	EcIspA and Matricaria recutita BBS		150	30	Fed batch	10% canola oil	30	1:100 preculture	Modified TB	1% glycerol	DH5a	309
(+)-Isodauc-8-en-11-ol	1.16	MVA	EcAACT, SaHMGS, SaHMGR, SpM5K, SpPMK, SpDMD, and SpIDI	ScFPPS, Streptomyces venezuelae ATCC 10712 IDS		72	25	Fed batch	20% dodecane	1	0.5-0.8	AM	3% glycerol	BL21 (DE3)	184
a-Farnesene	1.1	MVA	EcAACT, ScHMGS, ScHMGR, ScM5K, ScPMK, ScDMD, and EcIDI	EcIspA, Malus x domestica AFS		96	30	Shake flask	20% decane	0.15	0.6-0.8	YT	2% glycerol	BL21 (DE3)	176
a-Bisabolene	1.15	MVA	EcAACT, ScHMGS, ScHMGR, ScM5K, ScPMK, ScDMD, and EcIDI	EcIspA, Abies grandis BIS		72	30	Shake flask/tube?	10% dodecane	?	1.2	EZ-rich	1% glucose	DH1	58
Farnesol	1.419	MVA	EfAACT/HMGR, EfHMGS, ScM5K, ScPMK, ScDMD, and EcIDI	EcIspA, EcNudB and EcAphA		48	30	Test tube	20% oleyl alcohol	0.004	0.1	2YT	2% glycerol	DH5a	310
Protoilludene	1.119	MVA	EfAACT/HMGR, EfHMGS, SaMVK, SpPMK, SpDMD, and EcIDI	EcIspA and Omphalotus olearius OMP7		48	30	Test tube	20% decane	0.004	0.1	2YT	2% glycerol	DH5a	311
Pentalenene	0.78	MVA	EcAACT, ScHMGS, ScHMGR, ScM5K, ScPMK, ScDMD, and EcIDI	EcIspA and Streptomyces UC5319 PentS		72	30	Shake flask	20% decane	0.005?	0.6	EZ-rich	1% glucose	DH1	231
Epi-isozizaene	0.728	MVA	EcAACT, ScHMGS, ScHMGR, ScM5K, ScPMK, ScDMD, and EcIDI	EcIspA and Streptomyces coelicor EIZS		72	30	Shake flask	20% decane	0.005?	0.6	EZ-rich	1% glucose	DH1	231
Albaflavenol	0.013	MVA	EcAACT, ScHMGS, ScHMGR, ScM5K, ScPMK, ScDMD, and EcIDI	EcIspA, Streptomyces coelicolor A3 EIZS and CYP170A1		72	30	Shake flask?	10% nonane	0.005	?	EZ-rich	1% glucose	DH1	308
Alvaflavenone	0.003	MVA	EcAACT, ScHMGS, ScHMGR, ScM5K, ScPMK, ScDMD, and EcIDI	EcIspA, Streptomyces coelicolor A3 EIZS and CYP170A1		72	30	Shake flask?	10% nonane	0.005	?	EZ-rich	1% glucose	DH1	308
Cubebol	0.497	MEP	EcDXS and Haematococcus lacustris IDI	Pantoea ananatis GGPPS, Coniophora puteana Copu3		44	30	Fed batch	None	1.3	0.1	Modified R	3.5% glycerol	HMS174 (DE3)	44
Guaia-6,10(14)-diene	0.468	MVA	EcAACT, ScHMGS, ScHMGR, ScM5K, ScPMK, ScDMD, and EcIDI	EcIspA, Fusarium graminearum J1−012 FgJ02895		70	30	Fed batch	20% isopropyl myristate	2.5	30	M9	4% glycerol	BL21 (DE3)	312
Longifolene	0.382	MVA	EfAACT/HMGR, EfHMGS, ScM5K, ScPMK, ScDMD, and ScIDI	EcIspA, Picea abies LgfS		20	30	Fed batch	Off-gas measurement	3	10	Defined media	0.1% glucose	BL21 (DE3)	182
Nerolidol	0.323	MVA	EcAACT, ScHMGS, ScHMGR, ScM5K, ScPMK, ScDMD, and EcIDI	EcIspA, Agrocybe aegerita NLS		48	30	Shake flask	20% dodecane	0.001	1:50 fresh culture	Modified 2XPY	1% glycerol	MG1655	178
b-Copaene	0.215	MEP	EcDXS and Haematococcus lacustris IDI	Pantoea ananatis GGPPS, Coniophora puteana Copu2		47	30	Fed batch	None	1.3	0.1	Modified R	3.5% glycerol	HMS174 (DE3)	44
(+)-Zizaene	0.211	MVA	EcAACT, ScHMGS, ScHMGR, ScM5K, ScPMK, ScDMD, and EcIDI	EcIspA, Chrysopogon Zizanioides ZS		72	20	Fed batch	5% Diaion HP20	1.5	5-7	ADM	0.5% glucose	BL21 (DE3)	179
Caryophyllene	0.1	MVA	EcAACT, SaHMGS, SaHMGR, ScM5K, ScPMK, ScDMD, and EcIDI	AgGPPS, Hypoxylon sp. CI4A CS		72	30	Shake flask	None	0.025	0.8	EZ-rich	-	DH1	229
Caryolan-1-ol	0.01	MVA	EcAACT, SaHMGS, SaHMGR, ScM5K, ScPMK, ScDMD, and EcIDI	AgGPPS, Streptomyces griseus CS		72	30	Shake flask	None	0.025	0.8	EZ-rich	-	DH1	229
a-Isocomene	0.0775	MVA	EcAACT, ScHMGS, ScHMGR, ScM5K, ScPMK, ScDMD, and EcIDI	EcIspA and Matricaria recutita MrTPS2		72	30	Shake flask	20% decane	0.005?	0.6	EZ-rich	1% glucose	DH1	231
(-)-5-Epieremophilene	0.076	MVA	EcAACT, ScHMGS, ScHMGR, ScM5K, ScPMK, ScDMD, and EcIDI	EcIspA, Salvia miltiorrhiza STPS1		72	25	Shake flask	None	0.5	0.6-0.8	TB	5% glycerol	BL21 (DE3)	180
Valerenadiene	0.062	MVA	EcAACT, ScHMGS, ScHMGR, ScM5K, ScPMK, ScDMD, and EcIDI	EcIspA, Valeriana officinalis CVDS		48	30	Test tube	20% decane	0.005	?	2YT	3% glycerol	BL21 (DE3)	88
a-Humulene	0.06	MVA	EcAACT, ScHMGS, ScHMGR, ScM5K, ScPMK, ScDMD, and EcIDI	EcIspA, Zingiber zerumbet Smith HUM		24	20	Fed batch	10% Amberlite XAD4	1.8	1	ZYP31	1% glucose	BL21 (DE3)	313
(-)-Patchoulol	0.04	MVA	EcAACT, ScHMGS, ScHMGR, ScM5K, ScPMK, ScDMD, and EcIDI	EcIspA, Pogostemon cablin PTS		48	20	Fed batch	5% Diaion HP20	1.5	5	ADM	0.5% glucose	BL21 (DE3)	314
a-Copaene	0.007	MVA	EcAACT, ScHMGS, ScHMGR, ScM5K, ScPMK, ScDMD, and EcIDI	EcIspA, Ricinus communis SeTPS1		48	30	Shake flask	10% dodecane	?	0.5-0.6	EZ-rich	1% glucose	DH1	181
Cadinene	0.0035	MVA	EcAACT, ScHMGS, ScHMGR, ScM5K, ScPMK, ScDMD, and EcIDI	EcIspA, Ricinus communis SeTPS1		48	30	Shake flask	10% dodecane	?	0.5-0.6	EZ-rich	1% glucose	DH1	181
8-Hydroxycadinene	0.06	MVA	EcAACT, ScHMGS, ScHMGR, ScM5K, ScPMK, ScDMD, and ScIDI	EcIspA, Gossypium arboreum CAS, EcCYP706B1, Candida tropicalis CPR		96	20	Shake flask	20% dodecane	0.05	0.25-0.30	TB	2% glycerol	DH1	174
Diterpenoids
Sclareol	1.46	MVA	EcAACT, SaHMGS, SaHMGR, SpM5K, SpPMK, SpDMD, and SpIDI	Pantoea agglomerans GGPPS, Salvia sclarea LPS and ScSCS		68	30	Fed batch	10% dodecane	1	4?	AM	3% glycerol	BL21 (DE3)	185
Taxadiene	1.02	MEP	EcDXS, EcCMS, EcMCS, and EcIDI	Taxus canadensis GPPS, Taxus brevifolia TS		120	22	Fed batch	20% dodecane	1	0.8	Defined media	3% glycerol	MG1655	40
Taxadien-5a-ol	0.058	MEP	EcDXS, EcCMS, EcMCS, and EcIDI	Taxus canadensis GPPS, Taxus brevifolia TS, Taxus cuspidata CYP and CPR		70	22	Fed batch	20% dodecane	1	0.8	Complex media	3% glycerol	MG1655	40
Levopimaradiene	0.7	MEP	EcDXS, EcCMS, EcMCS, and EcIDI	Taxus canadensis GGPPS, Ginkgo biloba LPS		168	22	Fed batch	20% dodecane	1	0.1	Rich media	3% glycerol	MG1655	186
cis-Abienol	0.22	MVA	EfAACT/HMGR, EfHMGS, ScM5K, ScPMK, ScDMD, and ScIDI	EcIspA, Pantoea agglomerans GPPS, Salvia sclarea LPPS and Abies balsamea CAS		50	32	Fed batch	None	3	12	Modified M9	1% glucose	BL21 (DE3)	183
Cembratriene-ol	0.079	MEP	EcDXS and Haematococcus lacustris IDI	Pantoea ananatis GGPPS, Nicotiana sylvestris TPS		120	22	Fed batch	Amberlite XAD2 chromatography column	32	12	Optimized hydrolysate	1% glucose	HMS174 (DE3)	45
Kaurene	0.032	MEP	Streptomices avermitilis DXS and Bacillus subtilis IDI	Taxus canadensis GGPPS, Stevia rebaudiana CDPS and KS	EcAcrAB, EcTolC	120	28	Shake flask	20% dodecane	0.01	1:50 overnight culture	TB	2% glycerol	BL21 (DE3)	187
Abietadiene	0.03	MVA	EcAACT, ScHMGS, ScHMGR, ScM5K, ScPMK, ScDMD, and EcIDI	Abies grandis GGPPS and AS		65	20	Fed batch	None	1?	0.6	TB	4% glycerol	C41	89
Triterpenoids
Squalene	0.612	MVA	EfAACT/HMGR, EfHMGS, SpM5K, SpPMK, SpDMD, and EcIDI	EcIspA and ScSQS	EcTsr	48	30	Shake flask	None	?	0.1	2YT	2% glycerol	DH5a	277
Dammarenediol-II	0.0086	MEP	EcIDI	EcIspA, ScSS, Methylococcus capsulatus SE, Arabidopsis thaliana CPR, and Panax ginseng DS		48	25	Shake flask	None	0.03	0.6-0.8	TB	0.4% glycerol	BL21 (DE3)	315
Tetraterpenoids
Lycopene	448 mg/g DCW	MEP	EcDXS, EcCMS, EcMCS, and EcIDI	Pantoea agglomerans CrtEIB		48	37	Microtitre plate	None	0.00015	?	LB	-	MG1655	41
b-Carotene	3.6	MEP and MVA	EcDXS, EcHDS, EcHDR, EfAACT/HMGR, EfHMGS, SpM5K, SpPMK, SpDMD, and EcIDI	Pantoea agglomerans CrtEIB and CrtY	EcSucAB, EcSdhABCD, and EcTalB	48	30	Fed batch	None	3	45	Defined media	3% glycerol	ATCC 8739	316
Astaxanthin	1.18	MEP and MVA	EcDXS, EcHDS, EcHDR, EfAACT/HMGR, EfHMGS, SpM5K, SpPMK, SpDMD, and EcIDI	Pantoea agglomerans CrtEIB, CrtY, CrtZ, Brevundimonas sp. SD212 CrtW	GroES, GroEL, EcSucAB, EcSdhABCD, and EcTalB	60	30	Fed batch	None	3	45	Defined media	3% glycerol	ATCC 8739	316
Zeaxanthin	0.722	MVA	EcAACT, ScHMGS, ScHMGR, ScM5K, ScPMK, ScDMD, and EcIDI	EcIspA, Pantoea ananatis CrtEIBYZ		56	30	Fed batch	None	3	0.1?	SBMSN	glucose	CBW12241	317
b-Ionone (C13)	0.5	MVA	EcAACT, ScHMGS, ScHMGR, ScM5K, ScPMK, ScDMD, and EcIDI	EcIspA, Pantoea agglomerans CrtEIB, Pantoea ananatis CrtY, Petunia hybrid CCD1		48	28	Fed batch	12% isopropyl myristate	0.25	40	Defined media	1.5% glucose	BL21 (DE3)	318
Retinol (C15)	0.076	MEP and MVA	EcDXS, EfAACT/HMGR, EfHMGS, SpM5K, SpPMK, SpDMD, Haematococcus pluvialis IDI, and EcIDI	Pantoea agglomerans CrtEIB, Pantoea ananatis CrtY, uncultured marine bacterium 66A03 Blh variant (SR), EcYbbO		72	29	Test tube	100% dodecane	0.005	?	2YT	2%glycerol, 0.2% arabinose	DH5a	319
a-Ionone (C13)	0.48	MVA	EcAACT, ScHMGS, ScHMGR, ScM5K, ScPMK, ScDMD, and EcIDI	EcIspA, Pantoea agglomerans CrtEIB, Lactuca sativa LcyE, Osmanthus fragrans CCD1		48	28	Fed batch	12% isopropyl myristate	0.25	40	Defined media	1.5% glucose	BL21 (DE3)	318
Other
Coenzyme Q10	0.00564	MEP	EcDXS and EcIDI	EcIspA, Gluconobacter suboxydans DdsA	∆ispB, ∆pykFA, ∆gapA, Clostridium acetobutylicum GapC, EcPck, EcUbiCA	24	37	Shake flask	None	0.025	0.1	SOB	0.2% arabinose	BW2511	320
				Names of enzymes in MVA, MEP and alternative pathways indicate species with the first two letters: Ag, Abies grandis; Ec, Escherichia coli; Ef, Enterococcus faecalis; Sa, Staphylococcus aureus; Sc, Saccharomyces cerevisiae; Sp, Streptococcus pneumoniae; and activitity with the next letters: AACT, acetoacetyl-CoA thiolase; CMS, 4-diphophocytidyl-2-C-methyl-D-erythritol synthase; DMD, mevalonate py…
